# Supplementary material
Source: Springer Nature journal article supplement (https://www.springermedizin.de/resource/supplementary/13012_2010_394_MOESM1_ESM.PDF/9629936)
Supplement: MOESM1 [file 9629936]

# ENROLMENT IN THE ARV PROGRAMME

- ARVs prevent and treat AIDS. ARVs are for life.
- **Clients need ARVs if CD4  $\leq$  200 or stage 4 HIV. If pregnant, client needs ARVs if CD4  $\leq$  350 or stage 4 HIV.**
- All clients need routine HIV care (see page 17)
- At the first visit: - Assess eligibility for nurse-managed or doctor-managed ARVs (step 1)  
- Prepare all clients for ARVs with steps 2–6

## Step 1. Assess eligibility for nurse-managed or doctor-managed ARVs

- CD4 51-200 and
- Stage 1, 2 or 3 HIV and
- ARV-naïve (no previous ARVs or ARVs  $\leq$  1 month) and
- Able to walk unaided and
- Only using co-trimoxazole  $\pm$  multivitamins and
- Not pregnant and
- Weight  $>$  40kg and BMI  $<$  28

For nurse-managed ARVs

- CD4  $\leq$  50 or
- Stage 4 HIV or
- Previous use of ARVs ( $>$  1 month) or
- Bed- or wheelchair-bound or
- Using medication other than co-trimoxazole and multivitamins or
- Pregnant (refer same week for Drug Readiness Training) or
- Weight  $<$  40kg or BMI  $>$  28

Refer for doctor-managed-ARVs (same week if CD4  $\leq$  50 or pregnant)

## Step 2. Exclude TB. Always look for TB symptoms.

Exclude TB  
Go to page 6

Investigate for TB if any of the following are present:

- Cough  $\cdot$  2 weeks or
- Weight loss  $\cdot$  1.5kg in 4 weeks or
- Drenching night sweats or fever  $\cdot$  2 weeks or
- Chest pain or
- Blood stained sputum

} Send sputa for two smears  
(see pages 6 - 8 for diagnosing TB)

**If symptomatic, do not commence ARVs until TB has been excluded. If unsure, refer to doctor.**

## Step 3. Assess clinically

- ARVs are not an emergency treatment: HIV emergencies are usually due to opportunistic infections.
- Assess for opportunistic infections or other HIV-related diseases.
  - Refer the client with CD4  $\leq$  50 or Kaposi's sarcoma same week to doctor for ARVs.
  - Look for and treat **acute severe illness** – stabilize the client before starting ARVs. (See pages 24-35)
  - Ask about
    - **peripheral neuropathy** (pain, burning/ 'heat' or tingling in the hands or feet). (See page 31)
    - **depression**. (See page 35)
    - **pregnancy** (refer to doctor for ARVs same week)
- Assess nutritional status, calculate BMI (see page 18)

**Routine Care**  
Weight  
Exclude TB  
Review CD4  
Update Stage  
STI screen  
Condoms  
Pap

#### Step 4. Discuss contraception and safe sex

- Discuss your client's plans for a family. If required, advise reliable contraception (injectable contraceptive plus condoms).
- **Efavirenz causes birth defects. Women of child-bearing age must receive nevirapine instead.**
- Unsafe sex on ARVs can still transmit HIV and carries the risk of reinfection with different strains of HIV. This can lead to treatment failure.
- Encourage the use of condoms. Encourage your client to have only one partner.

#### Step 5. Assess blood results

- All clients need a baseline ALT.
- Normal range < 40 IU/ml. If result not within normal range, refer to doctor for assessment and to start ARVs

#### Step 6. Start Drug Readiness training at the same time as clinical work-up

**One session per week for three weeks – clients must complete all three sessions before starting ARVs**

**If client is pregnant, she should complete drug readiness training within one to two weeks**

- Session One: Disclosure and Positive Living
  - Session Two: Basics of HIV, CD4 and viral load; Co-trimoxazole prophylaxis
  - Session Three: Opportunistic Infections, ARV Treatment Plan, Adherence
- Encourage attendance by treatment 'buddy' (friend or family member)

#### Step 7. Assess readiness to start treatment

ARVs are not an emergency treatment. Clients must be clinically stable, psychologically prepared and adherent before starting treatment.

##### **Clinically ready?**

Able to walk unaided  
No TB symptoms  
No acute illness  
Normal baseline ALT

##### **Adherent?**

Takes co-trimoxazole/ multivitamins as instructed  
Attends appointments reliably  
Understands the importance of adherence  
Plans for regular attendance and adherence

##### **Socially ready?**

Treatment buddy  
Support group recommended  
No alcohol abuse  
Contraceptive/ condoms

**If yes to all the above, client is ready to start nurse-managed ARVs. If no to any of the above, refer for doctor-managed ARVs.**

#### Step 8. Start ARVs – Regimen 1

- The client must always receive 3 different ARVs. Prescribe 3TC and d4T and either:
  - nevirapine for all women of child-bearing age or
  - efavirenz for all men and women not of child-bearing age
- Counsel client about how to take ARVs
- Remind about possible side effects (see page 22)
- Draw baseline viral load
- Continue co-trimoxazole ± multivitamins.
- Schedule clinic follow-up after two weeks

| Antiretroviral   | Weight  | Dose  | Frequency                                           |
|------------------|---------|-------|-----------------------------------------------------|
| Lamivudine (3TC) | >40kg   | 150mg | 12-hourly                                           |
| Stavudine (d4T)  | 40-60kg | 30mg  | 12-hourly                                           |
| Nevirapine       | >40kg   | 200mg | once daily for 2 weeks, then 12-hourly <sup>1</sup> |
| Efavirenz        | >40kg   | 600mg | 24-hourly - the same time every night               |

<sup>1</sup>causes liver enzymes responsible for its own metabolism. Step-wise introduction helps to avoid sub-therapeutic levels and reduce the risk of skin rash and hepatitis.

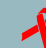

# MONITORING THE CLIENT ON ARVs

**Routine Care**  
 Weight  
 Exclude TB  
 Review CD4  
 Update Stage  
 STI screen  
 Condoms  
 Pap

## Follow-up appointments for client on ARVs. ARVs are for life.

- Check for adherence and reliable attendance. Re-issue medication (ARVs, co-trimoxazole) monthly.
- Check safety bloods according to schedule below
- Monitor response to ARVs (see below)
- Look for ARV side-effects and review safety bloods results. (See page 22)

| Week                  | 2                                                                                                                        | 4                                                                                         | 8                                                                                         | 12                                                                   | 24 (6 months)                                                                                                                                      | 48 (12 months)                                                                                                               | 6-monthly thereafter                                                                      | 12-monthly thereafter                                                                                                                  |
|-----------------------|--------------------------------------------------------------------------------------------------------------------------|-------------------------------------------------------------------------------------------|-------------------------------------------------------------------------------------------|----------------------------------------------------------------------|----------------------------------------------------------------------------------------------------------------------------------------------------|------------------------------------------------------------------------------------------------------------------------------|-------------------------------------------------------------------------------------------|----------------------------------------------------------------------------------------------------------------------------------------|
| Safety bloods per ARV | <ul style="list-style-type: none"> <li>• ALT (NVP)</li> <li>• Increase <b>NVP to 12-hourly if client well</b></li> </ul> | <ul style="list-style-type: none"> <li>• ALT (NVP)</li> <li>• FBC + diff (AZT)</li> </ul> | <ul style="list-style-type: none"> <li>• ALT (NVP)</li> <li>• FBC + diff (AZT)</li> </ul> | <ul style="list-style-type: none"> <li>• FBC + diff (AZT)</li> </ul> | <ul style="list-style-type: none"> <li>• ALT (NVP)</li> <li>• FBC + diff (AZT)</li> <li>• Fasting cholesterol and triglycerides (LPV/r)</li> </ul> | <ul style="list-style-type: none"> <li>• ALT (NVP)</li> <li>• FBC + diff (AZT)</li> <li>• Fasting Glucose (LPV/r)</li> </ul> | <ul style="list-style-type: none"> <li>• ALT (NVP)</li> <li>• FBC + diff (AZT)</li> </ul> | <ul style="list-style-type: none"> <li>• Fasting cholesterol &amp; triglycerides (LPV/r)</li> <li>• Fasting glucose (LPV/r)</li> </ul> |

## Monitoring response to ARVs

Response to ARVs is assessed clinically, virologically (with viral load, VL) and immunologically (with CD4)

**Exclude TB**  
Go to page 6

### Clinical

- After starting ARVs, opportunistic infections can occur, especially if CD4 < 100. Look for signs of infection, particularly TB, at each visit.
- Weight:
  - Investigate > 1.5kg weight loss.
  - Weight gain > 10kg or to BMI > 28 increases risk of lactic acidosis. Refer to doctor.

### CD4

- Check 6-monthly.
- Response varies from client to client.
- Some CD4s may never rise.
- Refer for doctor review if CD4 falls and new opportunistic infections or VL > 400.
- If well and CD4 > 200 stop co-trimoxazole

### Viral load

- Check 6-monthly.
- Should be < 400 or 'lower than detectable limits'.
- If > 400 refer to adherence counselor same day and refer to doctor for next ARV appointment.

## Treatment failure

- Refers to a VL persistently > 400 with or without the occurrence of opportunistic infections.
- The client will need to change to a new ARV regimen, usually regimen 2.
- The most common cause of treatment failure is low adherence.

| Regimen 2 ARVs                            | Weight             | Dose             | Frequency  |
|-------------------------------------------|--------------------|------------------|------------|
| Zidovudine (AZT)                          |                    | 300 mg           | 12-hourly  |
| Didanosine (ddl) <sup>1</sup>             | < 60 kg<br>> 60 kg | 250 mg<br>400 mg | Once a day |
| Lopinavir/ ritonavir (LPV/r) <sup>2</sup> |                    | 400/100 mg       | 12-hourly  |

## Approach to low adherence (See page 44 for an approach to adherence counseling)

More than 95% of ARV doses must be taken to avoid development of resistance.

- Educate on the importance of adherence and dangers of resistance
- Re-explain treatment schedule (12-hourly doses including weekends)
- Consider adherence aids (pillboxes, diaries)
- Ask about drug-related side-effects or alcohol abuse
- Refer client to adherence counselor
- Insist on participation in a support group
- See the client more frequently (weekly instead of monthly)
- Arrange a home visit

**Inform ARV site doctor and nurse of low adherence so that CD4 and VL can be interpreted accordingly.**

<sup>1</sup> Dissolve at least 2 tablets in water. Take on an empty stomach 1 hour before food or medication.

<sup>2</sup> Take with food to improve absorption. Store in a cool, dry place. (< 25 °C)
